# Supplementary material for: Serum Per- and Polyfluoroalkyl Substances Are Associated with Increased Hearing Impairment: A Re-Analysis of the National Health and Nutrition Examination Survey Data
Source: PubMed Central journal article supplement (PMC7460726; doi:10.3390/ijerph17165836), 2020-08-12
Supplement: ijerph-17-05836-s001.pdf [file ijerph-17-05836-s001.pdf]

## Supplemental materials

**Table 1.** The associations between four PFASs and hearing impairment (hearing threshold levels >25dB) (N = 2309).

| PFAS    | Hearing Threshold |                         |                         |                         |                         |    |                         |
|---------|-------------------|-------------------------|-------------------------|-------------------------|-------------------------|----|-------------------------|
|         | 500               | 1K                      | 2K                      | 3K                      | 4K                      | 6K | 8K                      |
| PFOA    |                   |                         |                         |                         |                         |    |                         |
| Q1      |                   |                         | Referent                | Referent                |                         |    |                         |
| Q2      |                   |                         | 1.29 (0.86–1.93)        | 1.36 (0.95–1.94)        |                         |    |                         |
| Q3      |                   |                         | 1.25 (0.84–1.87)        | 1.42 (1.00–2.03)        |                         |    |                         |
| Q4      |                   |                         | <b>1.68</b> (1.12–2.52) | <b>1.87</b> (1.29–2.69) |                         |    |                         |
| P-trend |                   |                         | 0.01                    | <0.01                   |                         |    |                         |
| PFOS    |                   |                         |                         |                         |                         |    |                         |
| Q1      | Referent          |                         | Referent                | Referent                |                         |    |                         |
| Q2      | 0.83 (0.52–1.31)  |                         | 0.71 (0.46–1.08)        | 0.77 (0.54–1.10)        |                         |    |                         |
| Q3      | 0.90 (0.58–1.40)  |                         | 1.05 (0.71–1.56)        | 1.01 (0.71–1.43)        |                         |    |                         |
| Q4      | 1.36 (0.87–2.13)  |                         | <b>1.70</b> (1.14–2.56) | 1.40 (0.97–2.03)        |                         |    |                         |
| P-trend | 0.02              |                         | <.0001                  | <0.01                   |                         |    |                         |
| PFNA    |                   |                         |                         |                         |                         |    |                         |
| Q1      |                   |                         | Referent                | Referent                | Referent                |    | Referent                |
| Q2      |                   |                         | <b>1.82</b> (1.19–2.77) | 1.24 (0.87–1.78)        | 1.31 (0.93–1.84)        |    | <b>1.45</b> (1.06–1.97) |
| Q3      |                   |                         | 1.42 (0.93–2.15)        | 1.01 (0.71–1.45)        | 1.15 (0.82–1.62)        |    | <b>1.66</b> (1.22–2.28) |
| Q4      |                   |                         | <b>1.86</b> (1.23–2.80) | <b>1.67</b> (1.17–2.38) | <b>1.60</b> (1.13–2.26) |    | <b>1.77</b> (1.27–2.46) |
| P-trend |                   |                         | 0.03                    | <0.01                   | 0.02                    |    | <0.01                   |
| PFHxS   |                   |                         |                         |                         |                         |    |                         |
| Q1      | Referent          | Referent                | Referent                |                         |                         |    |                         |
| Q2      | 0.76 (0.48–1.19)  | 1.02 (0.65–1.58)        | 1.06 (0.70–1.60)        |                         |                         |    |                         |
| Q3      | 0.87 (0.57–1.34)  | 1.06 (0.69–1.62)        | 1.17 (0.79–1.73)        |                         |                         |    |                         |
| Q4      | 1.32 (0.87–1.99)  | <b>1.53</b> (1.01–2.32) | <b>1.65</b> (1.12–2.44) |                         |                         |    |                         |
| P-trend | 0.02              | 0.01                    | <0.01                   |                         |                         |    |                         |

Data were presented as odds ratios and 95% confidence interval. Models were all adjusted for age, sex, body mass index, education, ethnicity group, family income, sample weights, and occupational noise exposure.
